# Supplementary material
Source: Springer Nature journal article supplement (https://www.springermedizin.de/resource/supplementary/13256_2011_1706_MOESM1_ESM.pdf/9648282)

a

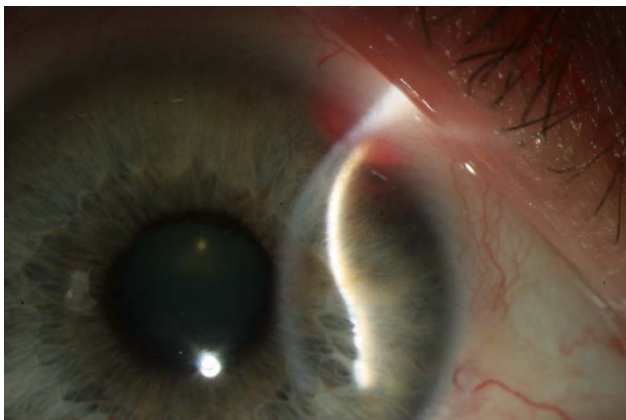

b

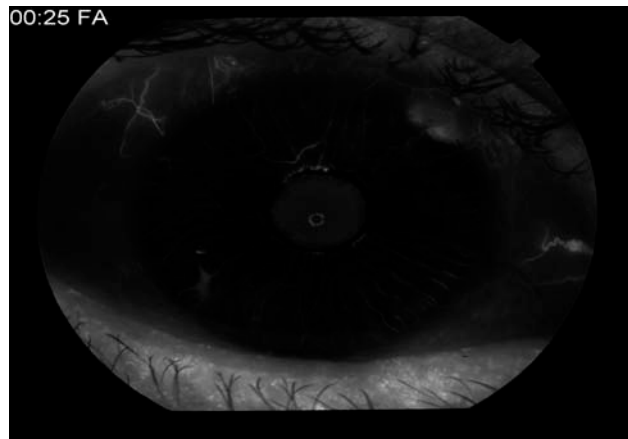

c

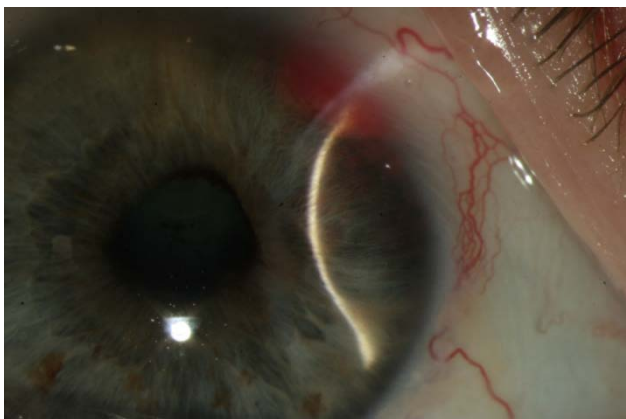

d

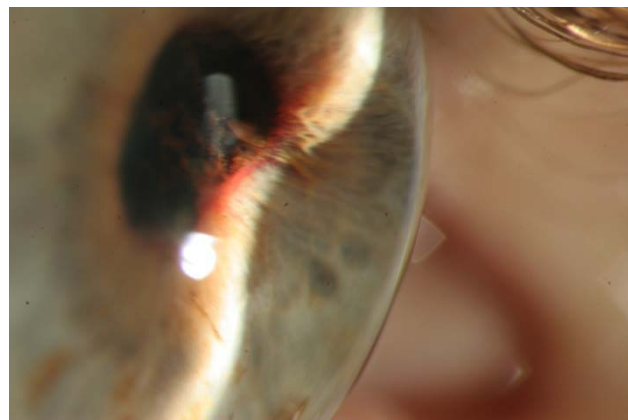

e

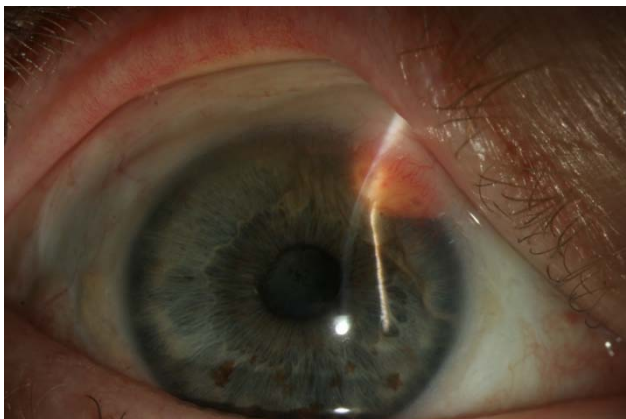

Supplement: MOESM1 [file 9648282]
